# Supplementary material
Source: PubMed Central journal article supplement (PMC5993936)
Supplement: mmc1.pdf [file mmc1.pdf]

## **Supplemental Information**

### **Phase I Study of Intrapleural Gene-Mediated Cytotoxic Immunotherapy in Patients with Malignant Pleural Effusion**

**Charu Aggarwal, Andrew R. Haas, Susan Metzger, Laura K. Aguilar, Estuardo Aguilar-Cordova, Andrea G. Manzanera, Gregoria Gómez-Hernández, Sharyn I. Katz, Evan W. Alley, Tracey L. Evans, Joshua M. Bauml, Roger B. Cohen, Corey J. Langer, Steven M. Albelda, and Daniel H. Serman**

Supplementary Table 1. Treatment emergent acute (day 1-16) laboratory abnormalities

| Category         | Event                     | Cohort 1 (n=3) |         | Cohort 2 (n=3) |         |         |         | Cohort 3 (n=13) |         |         |         |
|------------------|---------------------------|----------------|---------|----------------|---------|---------|---------|-----------------|---------|---------|---------|
|                  |                           | Grade 1        | Grade 2 | Grade 1        | Grade 2 | Grade 3 | Grade 4 | Grade 1         | Grade 2 | Grade 3 | Grade 4 |
| Hematologic      | Anemia                    | 1 (33%)        | 1 (33%) | 1 (33%)        | 1 (33%) | 1 (33%) |         |                 | 3 (23%) | 1 (8%)  |         |
|                  | Leukopenia                |                |         | 1 (33%)        |         |         |         | 1 (8%)          |         |         |         |
|                  | Lymphopenia               |                | 2 (66%) |                | 1 (33%) | 1 (33%) | 1 (33%) |                 | 3 (23%) | 3 (23%) | 1 (8%)  |
|                  | Thrombocytopenia          |                |         |                |         |         |         | 1 (8%)          |         |         |         |
| Other Laboratory | High Alkaline Phosphatase |                |         |                |         |         |         | 1 (8%)          |         |         |         |
|                  | High AST/ALT              |                |         | 1 (33%)        |         |         |         |                 |         |         |         |
|                  | High Creatinine           |                |         | 2 (66%)        |         |         |         | 4 (31%)         | 2 (15%) |         |         |
|                  | Hyponatremia              | 1 (33%)        |         |                |         |         |         | 4 (31%)         |         |         |         |
|                  | Hyperkalemia              |                |         |                |         |         |         | 3 (23%)         | 1 (8%)  |         |         |
|                  | Hypernatremia             |                |         | 1 (33%)        |         |         |         |                 |         |         |         |
|                  | Hypoalbuminemia           |                | 1 (33%) |                | 2 (66%) | 1 (33%) |         | 3 (23%)         | 4 (31%) |         |         |
|                  | Hypocalcemia              |                |         |                | 2 (66%) |         |         | 6 (46%)         |         |         |         |

Supplementary Table 2. Baseline Adenoviral Neutralizing Antibody Titers

| Patient | Baseline Nab Titers |
|---------|---------------------|
| 1MP01P  | 1:200               |
| 1MP02P  | 1:200               |
| 1MP03P  | <1:25               |
| 2MP01P  | 1:75                |
| 2MP02P  | 1:50                |
| 2MP03P  | <1:25               |
| 2MP04P  | 1:400               |
| 2MP05P  | 1:400               |
| 2MP06P  | 1:100               |
| 2MP07P  | 1:100               |
| 2MP08P  | <1:25               |
| 2MP09P  | 1:150               |
| 2MP10P  | 1:30                |
| 2MP11P  | 1:50                |
| 2MP12P  | 1:400               |
| 2MP14P  | 1:100               |
| 2MP15P  | <1:25               |
| 2MP16P  | >1:25,600           |
| 2MP17P  | 1:800               |

Supplementary Figure 1. Anti-tumor Antibodies by Western Blot

**Pt 2MP07P day 0**

L55 H1299 A549 H460 ChagoK1 H1264 H358 Calu3

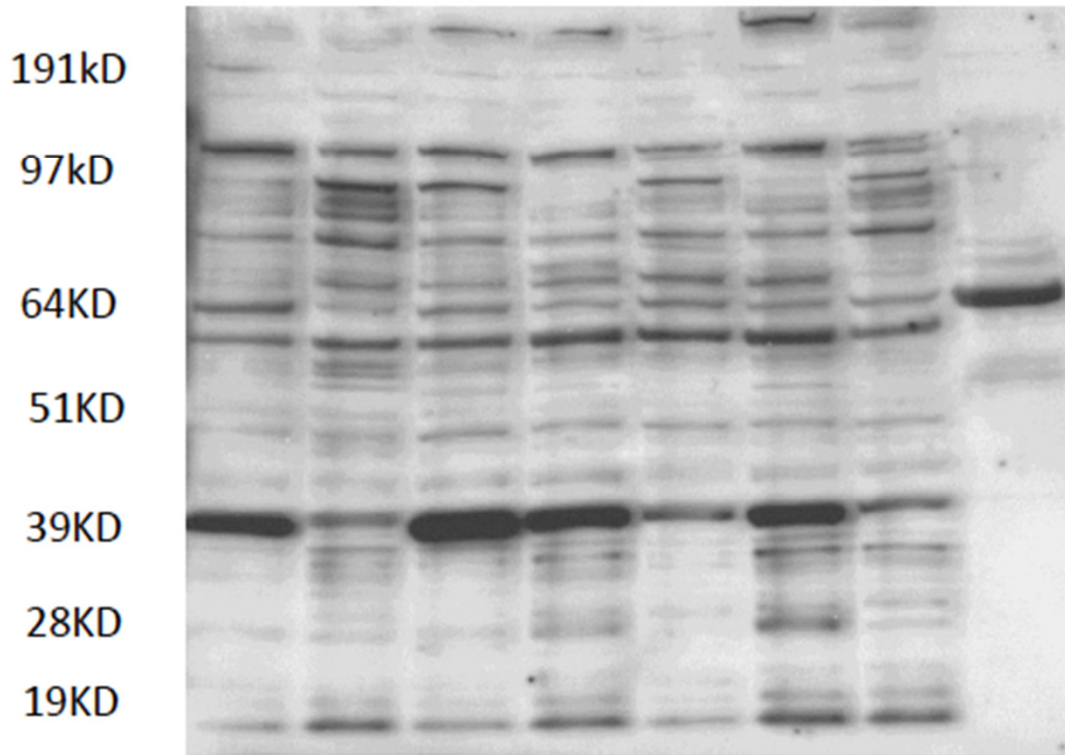

**Pt 2MP07P 2 weeks**

L55 H1299 A549 H460 ChagoK1 H1264 H358 Calu3

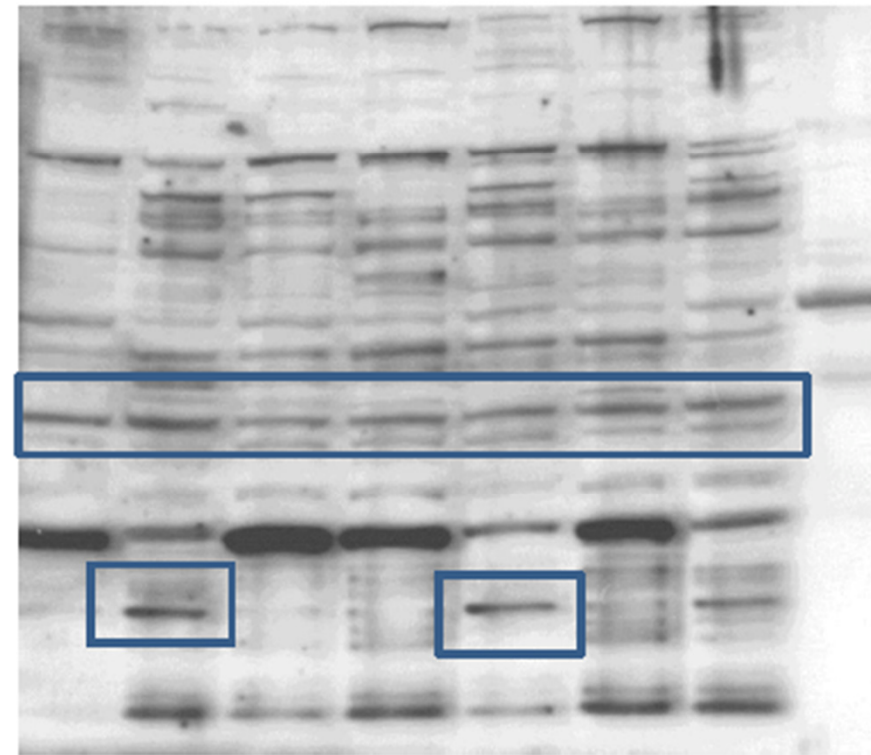

acts from cells or purified proteins were prepared and immunoblotted with patient serum (diluted at 1:1500) baseline, and post treatment. Comparison shows increase in the major bands detected.
